# Supplementary material for: Characterizing Phage Genomes for Therapeutic Applications
Source: Viruses. 2018 Apr 10;10(4):188. doi: 10.3390/v10040188 (PMC5923482; doi:10.3390/v10040188)
Supplement: Supplementary file 1 [file viruses-10-00188-s001.pdf]

|                          |                                                                                                                                                                                                                                                                                                                                                                                                                                                                                                                                                                                                 |
|--------------------------|-------------------------------------------------------------------------------------------------------------------------------------------------------------------------------------------------------------------------------------------------------------------------------------------------------------------------------------------------------------------------------------------------------------------------------------------------------------------------------------------------------------------------------------------------------------------------------------------------|
| EDGE Trimming            | <ul style="list-style-type: none"> <li>- Trim Quality Level: 30</li> <li>- Average Quality Cutoff: 30</li> <li>- Minimum Read Length: 50</li> <li>- "N" Base Cutoff: 2</li> <li>- Low complexity Filter Ratio: 0.85</li> <li>- Adapter FASTA: None</li> <li>- Cut #bp from 5' end: 0</li> <li>- Cut #bp from 3' end: 0</li> </ul>                                                                                                                                                                                                                                                               |
| CLC Trimming             | <ul style="list-style-type: none"> <li>- Ambiguous limit: 2</li> <li>- Quality limit: 0.001</li> <li>- Remove 5' terminal nucleotides: 0</li> <li>- Remove 3' terminal nucleotides: 0</li> <li>- Maximum number of nucleotides in reads: 1000</li> <li>- Minimum number of nucleotides in reads: 50</li> <li>- Discard short reads</li> </ul>                                                                                                                                                                                                                                                   |
| EDGE Assembly            | <ul style="list-style-type: none"> <li>- Assembler: SPAdes</li> <li>- Minimum Kmer Length: 31</li> <li>- Maximum Kmer Length: 121</li> <li>- Step size: 20</li> <li>- Minimum Contig Length: 200</li> <li>- Validation Aligner: Bowtie 2</li> </ul>                                                                                                                                                                                                                                                                                                                                             |
| CLC Assembly             | <ul style="list-style-type: none"> <li>- Mapping mode: Map reads back to contigs (slow)</li> <li>- Update Contigs</li> <li>- Mismatch cost: 2</li> <li>- Insertion cost: 3</li> <li>- Deletion cost: 3</li> <li>- Colospace error cost: 3</li> <li>- Length fraction: 0.5</li> <li>- Similarity fraction: 0.8</li> <li>- Colospace alignment</li> <li>- Alignment mode: global</li> <li>- Match mode: random</li> <li>- Bubble size: Automatic</li> <li>- Word size: 64</li> <li>- Minimum contig length: 200</li> <li>- Perform scaffolding</li> <li>- Auto-detect paired distances</li> </ul> |
| PhageTerm                | Paired reads<br>-s: 20<br>-d: 20<br>-m: 250                                                                                                                                                                                                                                                                                                                                                                                                                                                                                                                                                     |
| Contamination Check      | <ul style="list-style-type: none"> <li>- Must be less than 5% of reads mapping to host</li> </ul>                                                                                                                                                                                                                                                                                                                                                                                                                                                                                               |
| VF/AR/Integrase Presence |                                                                                                                                                                                                                                                                                                                                                                                                                                                                                                                                                                                                 |

|                     |                                                                                                                                                                                             |
|---------------------|---------------------------------------------------------------------------------------------------------------------------------------------------------------------------------------------|
| PHACTS              | --classes: classes_lifestyle<br>--replicates: 20<br>--exclude: None<br>--num_cases: 50<br>--percent: 1<br>--variables: 600<br>--short: 0                                                    |
| High Quality Genome | <ul style="list-style-type: none"> <li>- 90% of reads must map back to final genome</li> <li>- 100X coverage for complete genomes</li> <li>- ~400X coverage for finished genomes</li> </ul> |
